# Supplementary material
Source: Research Square preprint supplement (doi:10.21203/rs.3.rs-9713710/v1)
Supplement: Supplementary file 1 [file 3c3ec91e72ce3ef91b67fb53.docx]

**CD44 as a Conserved Biomarker and Functional Modulator of Neuroinflammation in Multiple Sclerosis and Beyond**

By Newshan Behrangi, Maria-Sophia Stadler, Christin Reinbach, Luisa Burkert, Alexander Hawlitschka, Hannes Kaddatz, Lukas Wenzel, Gemma Llovera, Andreas Wree, Chloè Hoornaert, Peter Ponsaerts, Uta Splietker, Lars-Ove Brandenburg, Sandra Amor, Simone Tauber, Amelie Bohn, Christoph Schmitz, Markus Kipp, and Tanja Hochstrasser

**Supplementary Material**

**Supplementary Tables**

**Supplementary Table S1.** Experimental cohorts used in this study.

| Cohort | Strain | Age in weeks | Weight | Sex | Experimental Group |
| --- | --- | --- | --- | --- | --- |
| Cuprizone | C57BL/6 | 9 | 20–22 g | ♀ | Ctrl (n = 4)  Cup 3 wks (n = 5)  Cup 5 wks (n = 4) |
| EAE | C57BL/6 | 10 | - | ♀ | Ctrl (n = 4)  EAE (n=3) |
| Cup/EAE | C57BL/6 | 9 |  | ♀ | Ctrl (n = 4)  Cup/EAE (n=6) |
| fMCAo | C57BL/6 | 10 | 23-32g | ♂ | Ctrl (n = 4)  4 h after stroke (n = 3)  3 d after stroke (n = 3) |
| 6-OHDA | C57BL/6 | 5-8 | 15–21.5 g | ♂/♀ | Ctrl (n = 5)  1 d after injection (n = 4)  4 d after injection (n = 4) |
| LPC | C57BL/6 | 7-8 | - | ♂ | Ctrl (n=10)  LPC (n=9) |
| *Cd44-/-* | C57BL/6 | 10 | 20–22 g | ♀ | Ctrl wt (n=12), *Cd44-/-*(n=15)  EAE wt (n=11), *Cd44-/-* (n=13)  Cup/EAE wt (n=11), *Cd44-/-* (n=12) |
| APP/PS1 | C57BL/6 | 26,  52 | - | ♂/♀ | wt (n=2)  0.5 y (n=3)  1 y (n=3) |
| CX3CR1+/eGFP/CCR2+/RFP | C57BL/6 | 9 | - | ♂/♀ | Ctrl (n=2)  Cup/EAE (n=3) |

**Supplementary Table S2.** Clinical details of MS patients.

| Sex | Age at death | MS disease duration | Date of birth | Date MS diagnosis | PMD | MS type | Cause of death |
| --- | --- | --- | --- | --- | --- | --- | --- |
| ♀ | 35 y | 10 y | 1979 | 2004 | 10.33 h | SPMS | Euthanasia |
| ♀ | 60 y | 10 y | 1950 | 2003 | 10.66 h | SPMS | Euthanasia |
| ♂ | 54 y | 15 y | 1957 | 1999 | 8.25 h | PPMS | Euthanasia |
| ♂  Controls | 49 y | 25 y | 1959 | 1983 | 8 h | SPMS | Pneumonia |
| ♀ | 86 y |  | 1923 |  | 6.5 h |  | Multiple myeloma |
| ♀ | 60 y |  | 1950 |  | 7.5 h |  | Infection |

SPMS: Secondary Progressive Multiple Sclerosis

PPMS: Primary progressive Multiple Sclerosis

**Supplementary Table S3.** Clinical details of MS and Non-MS CSF donors.

**MS CSF doners**

| Sex | Age | Treatment | MS Type |
| --- | --- | --- | --- |
| ♀ | 30 | No | RRMS |
| ♀ | 22 | No | RRMS |
| ♂ | 22 | No | RRMS |
| ♀ | 53 | No | SPMS |
| ♂ | 28 | No | RRMS |
| ♂ | 48 | No | RRMS |
| ♀ | 20 | No | RRMS |

RRMS: Relapsing-Remitting Multiple Sclerosis

**Non-MS CSF doners**

| Sex | Age |
| --- | --- |
| ♀ | 30 |
| ♀ | 22 |
| ♂ | 22 |
| ♀ | 53 |
| ♂ | 28 |
| ♂ | 48 |
| ♀ | 20 |

**Supplementary Table S4.** Primary antibodies.

| Anti- | Host | Applicationa | Dilution | HIERb | Supplier | Catalog # | RRIDc |
| --- | --- | --- | --- | --- | --- | --- | --- |
| APP | mouse | IHC | 1:5,000 | Tris-EDTA | Millipore | MAB348 | AB_94882 |
| CD3 | rat | IHC  IF | 1:250  1:250 | Tris-EDTA | Abcam | ab11089 | AB_369097 |
| CD3 | rabbit | IHC | 1:1000 | Tris-EDTA | Abcam | Ab16669 |  |
| CD44 | rabbit | IHC  IF | 1:4,000  1:4,000 | - | Abcam | ab189524 | - |
| GFAP | chicken | IHC  IF | 1:5,000  1:4,000 | - | Abcam | ab4674 | AB_304558 |
| IBA1 | rabbit | IHC  IF | 1:5,000  1:1,000 | Tris-EDTA | Wako | 019-19741 | AB_2665520 |
| MHC-II, HLA-DR (clone LN3) | Mouse | IHC | 1:1500 | Citrat | Thermo Fisher, USA | MA5-11966 | AB_10979984 |
| PLP | mouse | IHC | 1:5000 | - | Biorad | MCA839G | AB_2237198 |
| APP A4 | mouse | IHC | 1:5000 | Tris-EDTA | Millipore | MAB348 |  |
| IgG Isotype Control | rabbit | IHC | 1:2 (0.25μg/ml) | - | Thermo Fisher, USA | 08-6199 | AB_2532942 |

aIF, immunofluorescence; IHC, immunohistochemistry; WB, Western blotting

bHeat induced epitope retrieval

cResearch resource identifier

**Supplementary Table S5.** Secondary antibodies.

| Anti- | Host | Dilution | Supplier | Catalog # |
| --- | --- | --- | --- | --- |
| chicken IgG | goat | 1:200 | Vector laboratories | BA9010 |
| chicken AlexaFluorTM594 | goat | 1:200 | Life Technologies | A11042 |
| mouse IgG | goat | 1:200 | Vector laboratories | BA9200 |
| rabbit IgG | goat | 1:200 | Vector laboratories | BA1000 |
| rabbit AlexaFluorTM594 | goat | 1:200 | Life Technologies | A11008 |
| rat IgG | goat | 1:200 | Vector laboratories | BA9400 |
| rat AlexaFluorTM488 | donkey | 1:200 | Life Technologies | A21208 |

**Supplementary Figures**

**A**

**B**

**Supplementary Fig. S1 A** Clinical scores of control (Ctrl) and Cup/EAE animals. **B** Number of perivascular cuffs (PVCs) in Ctrl and Cup/EAE animals.


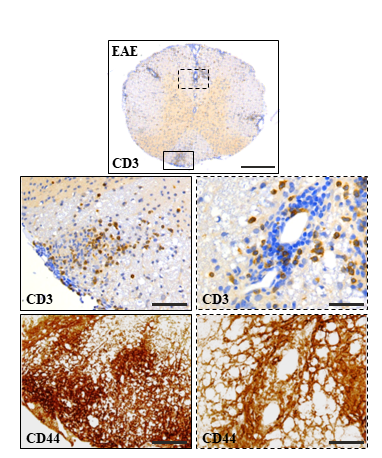


**B**

**A**

**Supplementary Fig. S2 A** Anti-CD3 staining overview (scale bar: 500 µm) with higher magnification images showing CD3 and CD44 localization in spinal cord white matter of EAE animals (left: 100 µm; right: 25 µm). **B** Quantification of histopathological features in control (Ctrl), CFA+PTX, and EAE groups using one-way ANOVA with Sidak’s multiple comparisons test. Data are mean ± SEM; significance indicated (*p ≤ 0.05, **p ≤ 0.01, ***p ≤ 0.001).


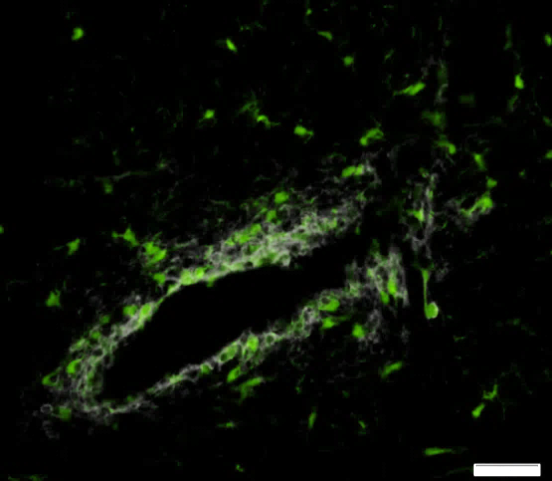

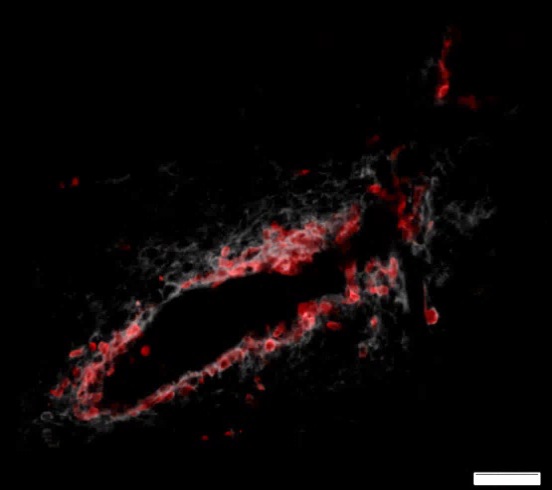


**RFP (CD44+ monocytes) /**

**CD44**

**eGFP(CD44+ microglia) /**

**CD44**

**Supplementary Fig. S3** CD44 expression of brain resident microglia and infiltrating monocytes around perivascular cuffs shown in transgenic (CX3CR1+/eGFP/CCR2+/RFP) Cup/EAE mice. Arrows indicate eGFP-expressing microglia (green) and RFP-expressing monocyte derived macrophages (red) in the perivascular region.

**Supplementary Fig. S4** ELISA standard curve of CD44.
